# Supplementary material
Source: PubMed Central journal article supplement (PMC4815101)
Supplement: supp_tpc.15.00537_TPC2015-00537-RAR1_Supplemental_Data.pdf [file supp_tpc.15.00537_TPC2015-00537-RAR1_Supplemental_Data.pdf]

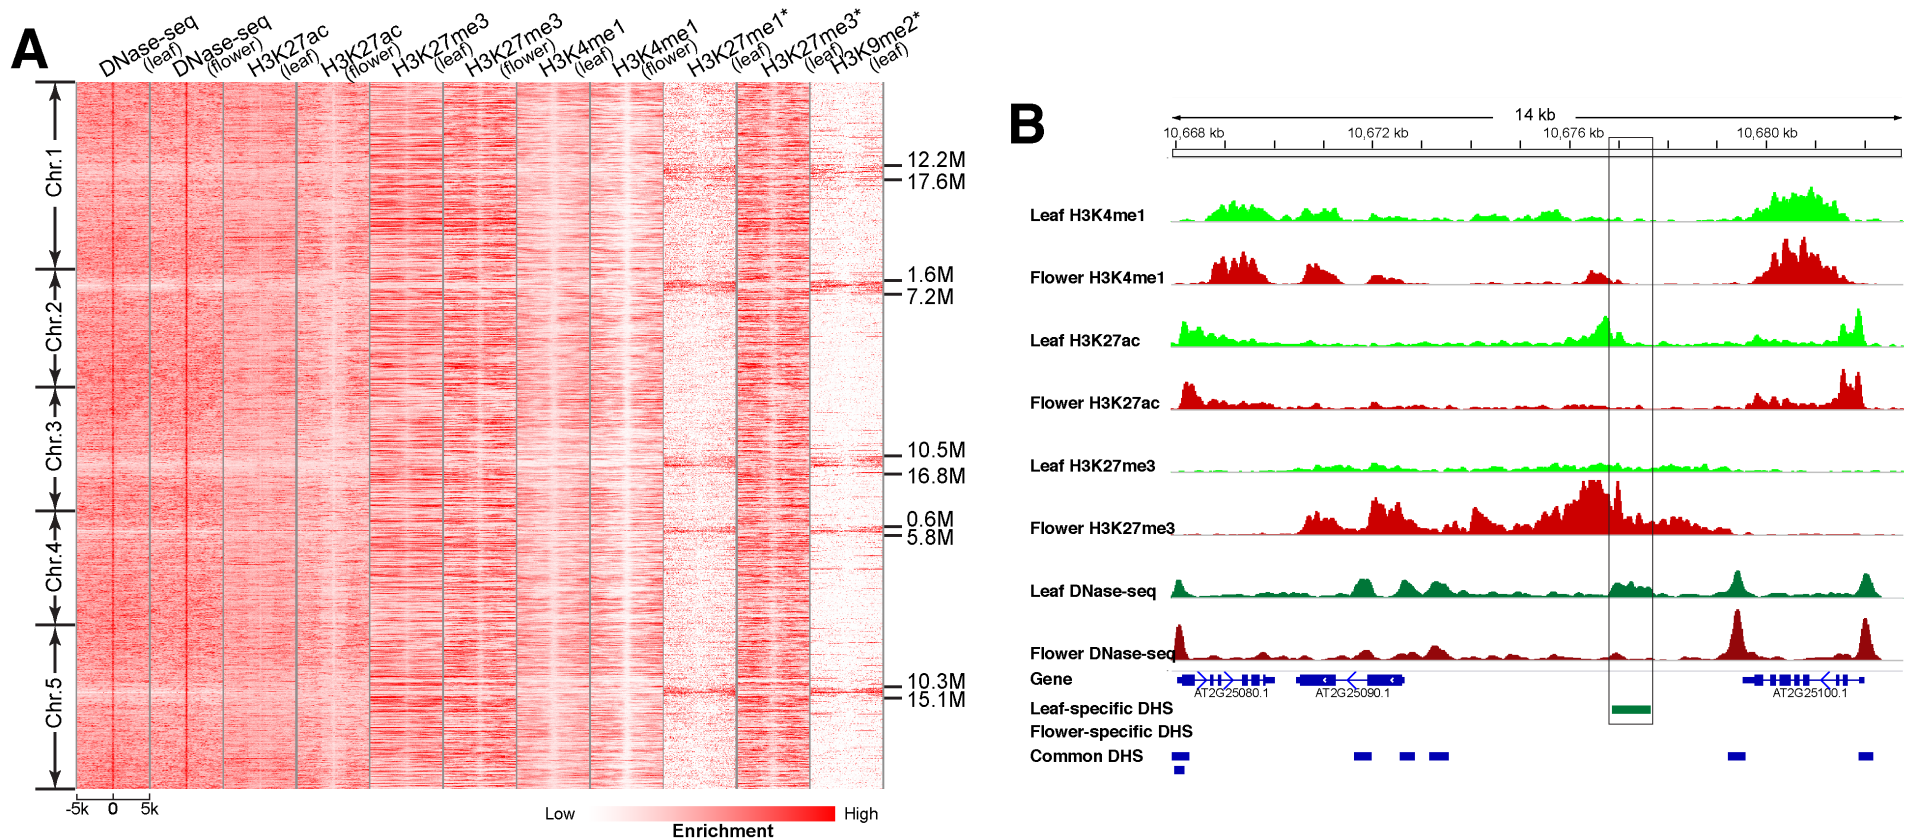

**Supplemental Figure 1.** Histone modification patterns associated with predicted enhancers in *Arabidopsis*. **(A)** Heatmaps of histone modifications associated with all predicted intergenic enhancers. A total of 10,044 predicted enhancers are arranged according to their positions on the five *Arabidopsis* chromosomes. The flanking regions ( $\pm 5$  kb) of the predicted enhancers are enriched with H3K27ac and H3K27me3, but not with H3K27me1 and H3K9me2. Enrichment of H3K27me1 and H3K9me2 are only associated with the flanking regions of a small number of predicted enhancers located near the pericentromeric regions of the five chromosomes, which are marked by chromosomal positions (Mb) on the right side of the figure. Three datasets marked by “\*” were generated by Luo et al. (2013, Plant J. 73: 77-90). The H3K27me3 data from Luo et al. showed a similar pattern as H3K27me3 data from this study. **(B)** An example of histone modifications associated with a single predicted leaf-specific enhancer.

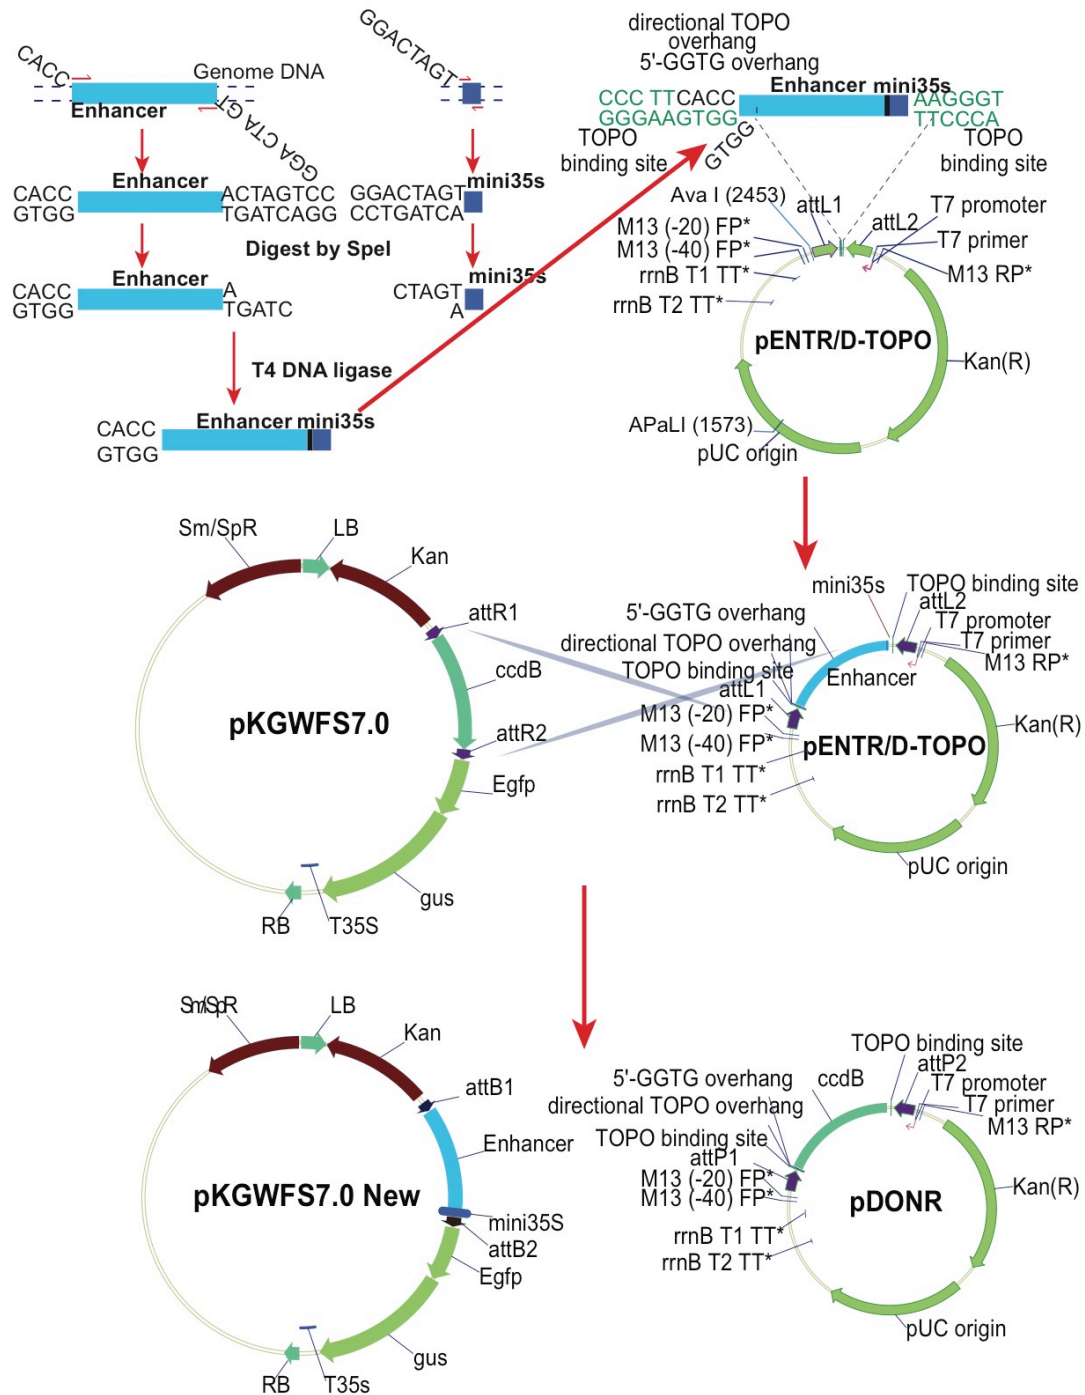

**Supplemental Figure 2.** Diagram of the development of enhancer validation constructs. The genomic sequence of each predicted enhancer is isolated from *Arabidopsis thaliana* ecotype Col-0. The predicted enhancer region is amplified using a forward primer specific to the genomic sequence with the bases CACC attached to the 5' end, and a reverse primer containing the *SpeI* restriction enzyme site GGACTAGT also attached to the 5' end. The minimal 35S promoter region is simultaneously amplified from any plasmid containing the 35S promoter using a forward primer also including the *SpeI* site. These two amplified fragments are digested with *SpeI*, and then ligated together with T4 DNA ligase. The CACC sequence at the 5' end of the enhancer fragment facilitates double strand invasion during the TOPO reaction. This directionally clones the enhancer sequence and minimal 35s into the entry vector pENTR/D-TOPO, and allows for downstream Gateway cloning. The entry vector containing the enhancer and mini35s insert is used in the LR recombination reaction along with pKGWFS7.0. The LR recombination replaces the *ccdB* gene in the destination vector (pKGWFS7.0) with the enhancer and mini35s sequence. The recombination places the enhancer and mini35s sequence upstream of the *eGFP* and  $\beta$ -glucuronidase reporter genes.

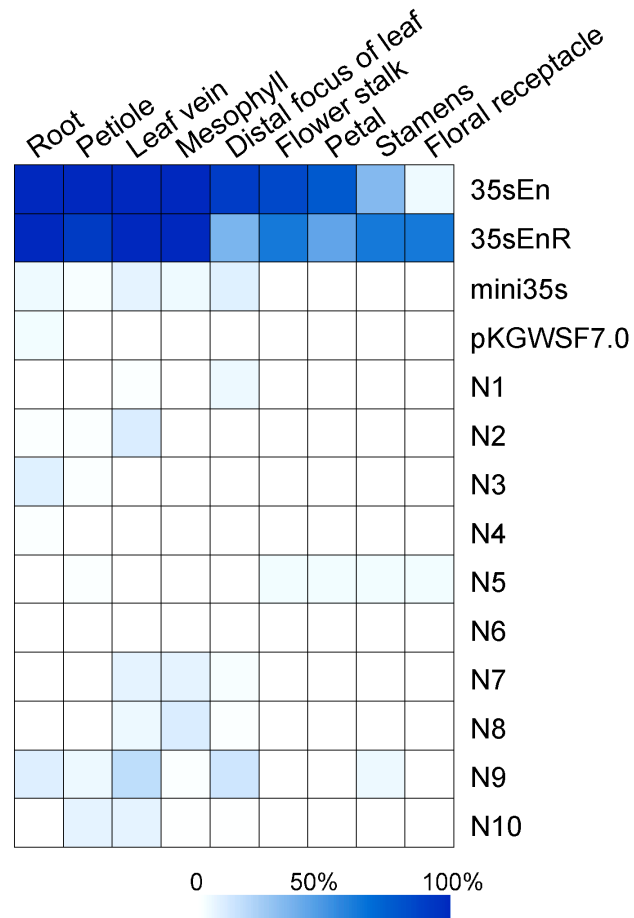

**Supplemental Figure 3.** Heatmap of GUS expression in different tissues of transgenic plants transformed with 10 non-enhancer constructs and control constructs. White indicates no GUS expression was detected in any plants. Blue indicates that GUS expression was detected in 100% of the transgenic plants.

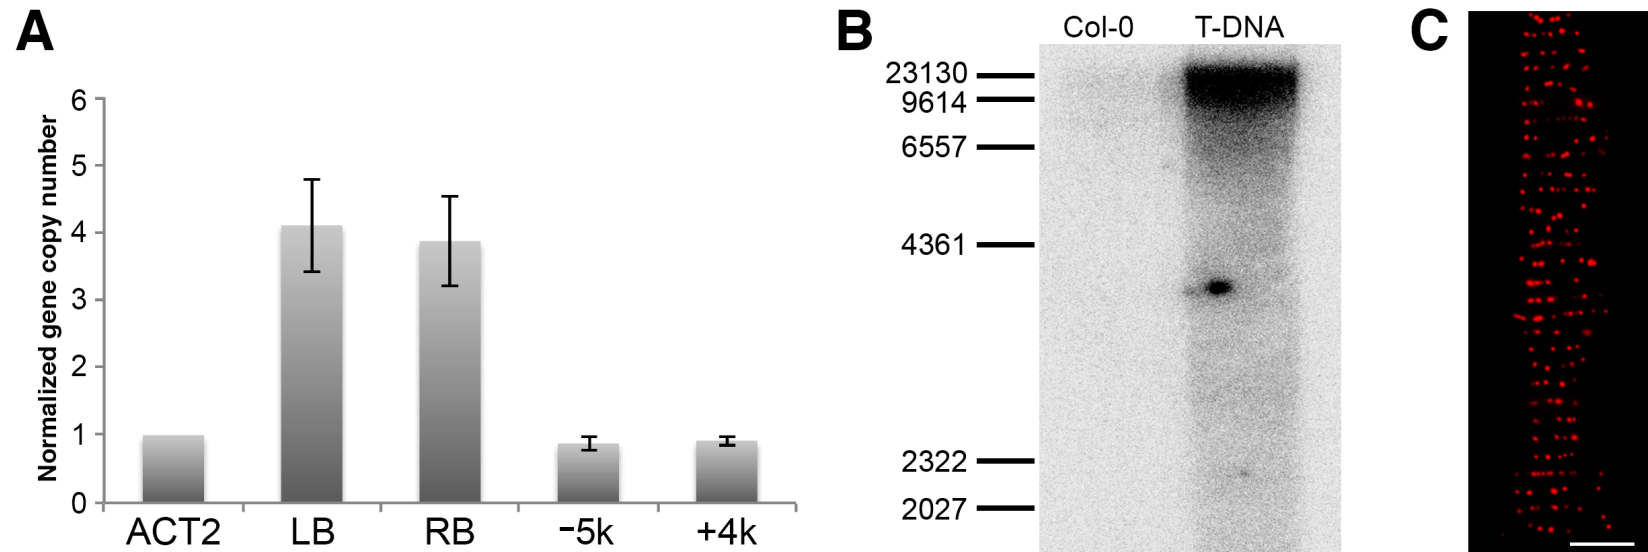

**Supplemental Figure 4.** Characterization of the T-DNA inserted in L3 enhancer. **(A)** Quantitative PCR analysis of the copy number of the T-DNA insert. Two single-copy genes, -5k and +4k, which flank the L3 enhancer, and the ACT2 gene were used as controls. The error bars represent standard deviation based on qPCR data from three biological replicates. **(B)** Southern blot hybridization of T-DNA in the T-DNA line and wild type Col-0. A single hybridization band >20 kb is detected in the T-DNA line. **(C)** 30 independent fiber-FISH signals collected from the T-DNA line. Bar represents 10  $\mu$ m, which are equivalent to approximately 30 kb.

**Supplemental Table 1.** Genomic locations and primers for all predicted enhancers and non-enhancer controls

| Chromosome location    | Construct (short name) | Size (bp) | Forward primer 5'-3'              | Reverse primer 5'-3'              |
|------------------------|------------------------|-----------|-----------------------------------|-----------------------------------|
| Chr4_14841212_14841779 | Common DHS 1 (C1)*     | 568       | caccTGTGACCATCTTTTAAGGCGAATGA***  | ggactagtTAGACAGACTTGAGAGCATTGTGA  |
|                        | Common DHS 1R (C1R)    | 568       | ggactagtTGTGACCATCTTTTAAGGCGAATGA | caccTAGACAGACTTGAGAGCATTGTGA      |
| Chr5_23022352_23023035 | Common DHS 2 (C2)*     | 684       | caccTGGGTGCGACGACACCATAGTC        | ggactagtGCCGGCCACAGTTAACCTCCT     |
|                        | Common DHS 2R (C2R)    | 684       | ggactagtTGGGTGCGACGACACCATAGTC    | caccGCCGGCCACAGTTAACCTCCT         |
| Chr2_11500116_11500529 | Common DHS 3 (C3)*     | 393       | caccGCTTGTAAAGAACTCATGTATCC       | ggactagtGTAATCGATGCTATGTTGTAGG    |
|                        | Common DHS 3R (C3R)    | ND        | ND**                              | ND                                |
| Chr3_9043279_9043858   | Common DHS 4 (C4)      | 580       | caccTTCCCATTCATCCATTTGCG          | ggactagtGTCGTAAAATGAAATTACAGAAGCA |
|                        | Common DHS 4R (C4R)    | 580       | ggactagtTTCCCATTCATCCATTTGCG      | caccGTCGTAAAATGAAATTACAGAAGCA     |
| Chr4_17183498_17184077 | Common DHS 5 (C5)      | 580       | caccTGGTGGCTAAGTTTTCTCTCT         | ggactagtGTCTTGGGAACAAGCGAAAG      |
|                        | Common DHS 5R (C5R)    | 580       | ggactagtTGGTGGCTAAGTTTTCTCTCT     | caccGTCTTGGGAACAAGCGAAAG          |
| Chr5_2247896_2248279   | Common DHS 6 (C6)      | 384       | caccCTGACGAGCGTATATTGATGC         | ggactagtTGCAATGAAATTGAAGAAGTAA    |
|                        | Common DHS 6R (C6R)    | ND        | ND                                | ND                                |
| Chr4_13816308_13816710 | Common DHS 7 (C7)      | 403       | caccATCCAGTGTTTGGTGTCCCTA         | ggactagtTCGCTGAATATTCGGATGGG      |
|                        | Common DHS 7R (C7R)    | ND        | ND                                | ND                                |
| Chr2_17839521_17840082 | Common DHS 8 (C8)      | 562       | caccCTAGGAGGAGTTTGAGATG           | ggactagtGAGCACAATGAGAGATTGCTGTTC  |
|                        | Common DHS 8R (C8R)    | 562       | ggactagtCTAGGAGGAGTTTGAGATG       | caccGAGCACAATGAGAGATTGCTGTTC      |
| Chr1_7700553_7701140   | Leaf DHS 1 (L1)        | 588       | caccAAACTGTAACGTTTGGCTGAAAAA      | ggactagtCGGACAATTAACGTTCTCCAATGC  |
|                        | Leaf DHS 1R (L1R)      | 588       | ggactagtAAACTGTAACGTTTGGCTGAAAAA  | caccCGGACAATTAACGTTCTCCAATGC      |
| Chr2_14064942_14065385 | Leaf DHS 2 (L2)        | 444       | caccAGAGTCCAACGATTACGCAGC         | ggactagtACAGATAAACTGTGGTACGGTTCT  |
|                        | Leaf DHS 2R (L2R)      | 444       | ggactagtAGAGTCCAACGATTACGCAGC     | caccACAGATAAACTGTGGTACGGTTCT      |
| Chr2_18722871_18723495 | Leaf DHS 3 (L3)        | 625       | caccAATCGGGATGGTCCGCATAA          | ggactagtTGATCCGTTTTGTTTTCTCAACCA  |
|                        | Leaf DHS 3R (L3R)      | 625       | ggactagtAATCGGGATGGTCCGCATAA      | caccTGATCCGTTTTGTTTTCTCAACCA      |
| Chr1_17578056_17578677 | Flower DHS 1 (F1)      | 622       | caccTCTCGTAAACCAGCGCCGTC          | ggactagtACGTCGATAAGTGTTCGGCCA     |
|                        | Flower DHS 1R (F1R)    | 622       | ggactagtTCTCGTAAACCAGCGCCGTC      | caccACGTCGATAAGTGTTCGGCCA         |
| Chr1_24662761_24663293 | Flower DHS 2 (F2)      | 533       | caccAGGCTGAAAACGAGATGTTATCG       | ggactagtAGAGTAGATGTCTGTGCACAATGTT |
|                        | Flower DHS 2R (F2R)    | 533       | ggactagtAGGCTGAAAACGAGATGTTATCG   | caccAGAGTAGATGTCTGTGCACAATGTT     |
| Chr1_27175205_27176010 | Flower DHS 3 (F3)      | 806       | caccTTTACGCTGTCCGGTGACGA          | ggactagtTTTGTACCATGTGTTGACAGTTCT  |
|                        | Flower DHS 3R (F3R)    | ND        | ND                                | ND                                |
| Chr1_14153271_14153725 | Non-DHS 1 (N1)         | 455       | caccTGCACCATACCAATGTTGAAG         | ggactagtCCGACGTTGGTTTGAATGT       |
| Chr1_21647295_21647699 | Non-DHS 2 (N2)         | 405       | caccGAGATGACGAGGATTGAAACG         | ggactagtTGAAACCGATTATGTGTCAAAA    |
| Chr2_15963538_15964250 | Non-DHS 3 (N3)         | 713       | caccGGATCGTCAGTAAGAGACCC          | ggactagtACTCTCCATTTGCTCTACCG      |
| Chr3_11223420_11223838 | Non-DHS 4 (N4)         | 419       | caccCAGTCCAACCAATCACCTTG          | ggactagtTGCTTTAGCGAAATCTGCTC      |
| Chr3_11903139_11903725 | Non-DHS 5 (N5)         | 587       | caccAAGCAAGGATACCAAGGGAG          | ggactagtGTGTAATGAGCCCTACTGGG      |
| Chr3_4842741_4843184   | Non-DHS 6 (N6)         | 444       | caccCCAACGAACATAACGACTGC          | ggactagtGTAAGTGCACAAATTCGTTG      |
| Chr5_10387620_10387978 | Non-DHS 7 (N7)         | 359       | caccGGCACACAAGGGATGAGATA          | ggactagtACCAGTTGACCAACCTGAT       |
| Chr5_10388716_10389094 | Non-DHS 8 (N8)         | 379       | caccGTCCATTTTGGGTGCTTGAA          | ggactagtCCAAGATGTGTTTGGTGCTT      |
| Chr5_10423499_10423791 | Non-DHS 9 (N9)         | 293       | caccATGTTTGTGGTGTCCGTC            | ggactagtTGACAGGATTTGGCAAGGTA      |
| Chr2_15964858_15965334 | Non-DHS 10 (N10)       | 477       | caccGAAGCCGAAAAGTGAAGGTG          | ggactagtAGTCAAACCATCAACAACC       |

\* These three putative enhancers were identified previously by the traditional enhancer trapping method (Michael and McClung, 2003, Plant Physiology 132: 629-639).

\*\* ND: not developed.

\*\*\* Low case letters represent added bases for cloning purposes, capital letters represent Arabidopsis genomic DNA sequences.

**Supplemental Table 2.** GUS expression in transgenic plants derived from all enhancer constructs and non-enhancer control constructs

| Construct     | Tissue with GUS expression in transformed T1 plants |             |               |               |                          |                  |            |             |                       |
|---------------|-----------------------------------------------------|-------------|---------------|---------------|--------------------------|------------------|------------|-------------|-----------------------|
|               | Root (%)                                            | Petiole (%) | Leaf vein (%) | Mesophyll (%) | Distal focus of leaf (%) | Flower stalk (%) | Petal (%)  | Stamens (%) | Floral receptacle (%) |
| 35sEn         | 100 (23/23)                                         | 100 (23/23) | 100 (23/23)   | 100 (23/23)   | 91 (21/23)               | 86 (12/14)       | 79 (11/14) | 36 (5/14)   | 7 (1/14)              |
| 35sEnR        | 100 (13/13)                                         | 92 (12/13)  | 100 (13/13)   | 100 (13/13)   | 38 (5/13)                | 64 (7/11)        | 45 (5/11)  | 64 (7/11)   | 64 (7/11)             |
| mini35s       | 7 (4/61)                                            | 5 (3/61)    | 10 (6/61)     | 7 (4/61)      | 11% (7/61)               | 0 (0/12)         | 0 (0/12)   | 0 (0/12)    | 0 (0/12)              |
| pKGWSF7.0     | 6 (1/18)                                            | 0 (0/18)    | 0 (0/18)      | 0 (0/18)      | 0 (0/18)                 | 0 (0/12)         | 0 (0/12)   | 0 (0/12)    | 0 (0/12)              |
| Common DHS 1  | 8 (1/12)                                            | 83 (10/12)  | 75 (9/12)     | 75 (9/12)     | 8 (1/12)                 | 88 (14/16)       | 19 (3/16)  | 19 (3/16)   | 6 (1/16)              |
| Common DHS 1R | 67 (8/12)                                           | 92 (11/12)  | 50 (6/12)     | 100 (12/12)   | 67 (8/12)                | 36 (4/11)        | 18 (2/11)  | 9 (1/11)    | 9 (1/11)              |
| Common DHS 2  | 4 (1/24)                                            | 13 (3/24)   | 8 (2/24)      | 21 (5/24)     | 17 (4/24)                | 67 (4/6)         | 0 (0/6)    | 0 (0/6)     | 0 (0/6)               |
| Common DHS 2R | 0 (0/24)                                            | 4 (1/24)    | 13 (3/24)     | 21 (5/24)     | 0 (0/24)                 | 0 (0/19)         | 0 (0/19)   | 0 (0/19)    | 0 (0/19)              |
| Common DHS 3  | 0 (0/28)                                            | 0 (0/28)    | 4 (1/28)      | 0 (0/28)      | 0 (0/28)                 | 0 (0/12)         | 0 (0/12)   | 0 (0/12)    | 0 (0/12)              |
| Common DHS 4  | 8 (1/12)                                            | 100 (12/12) | 33 (4/12)     | 42 (5/12)     | 25 (3/12)                | 83 (10/12)       | 33 (4/12)  | 33 (4/12)   | 42 (5/12)             |
| Common DHS 4R | 0(0/11)                                             | 82 (9/11)   | 9 (1/11)      | 9 (1/11)      | 0 (0/12)                 | 0 (0/10)         | 0 (0/10)   | 0 (0/10)    | 10 (1/10)             |
| Common DHS 5  | 0 (0/12)                                            | 0 (0/12)    | 0 (0/12)      | 0 (0/12)      | 0 (0/12)                 | 0 (0/11)         | 36 (4/11)  | 73 (8/11)   | 0 (0/11)              |
| Common DHS 5R | 56 (5/9)                                            | 22 (2/9)    | 11 (1/9)      | 11 (1/9)      | 11 (1/9)                 | 0 (0/11)         | 0 (0/11)   | 0 (0/11)    | 0 (0/11)              |
| Common DHS 6  | 0 (0/25)                                            | 0 (0/25)    | 0 (0/25)      | 0 (0/25)      | 0 (0/25)                 | 0 (0/13)         | 0 (0/13)   | 0 (0/13)    | 0 (0/13)              |
| Common DHS 7  | 0 (0/23)                                            | 4 (1/23)    | 0 (0/23)      | 0 (0/23)      | 4 (1/23)                 | 0 (0/12)         | 0 (0/12)   | 0 (0/12)    | 0 (0/12)              |
| Common DHS 8  | 4 (1/24)                                            | 4 (1/24)    | 4 (1/24)      | 4 (1/24)      | 42 (10/24)               | 0 (0/18)         | 0 (0/18)   | 6 (1/18)    | 0 (0/18)              |
| Common DHS 8R | 0 (0/18)                                            | 6 (1/18)    | 17(3/18)      | 11 (2/18)     | 78 (14/18)               | 0 (0/15)         | 0 (0/15)   | 0 (0/15)    | 0 (0/15)              |
| Leaf DHS 1    | 7 (1/15)                                            | 13 (2/15)   | 27 (4/15)     | 0 (0/15)      | 47 (7/15)                | 0 (0/13)         | 0 (0/13)   | 0 (0/13)    | 0 (0/13)              |
| Leaf DHS 1R   | 0 (0/7)                                             | 29 (2/7)    | 14 (1/7)      | 0 (0/7)       | 57 (4/7)                 | -                | -          | -           | -                     |
| Leaf DHS 2    | 36 (5/14)                                           | 7 (1/14)    | 21 (3/14)     | 21 (3/14)     | 21 (3/14)                | 0 (0/14)         | 0 (0/14)   | 0 (0/14)    | 0 (0/14)              |
| Leaf DHS 2R   | 11 (2/18)                                           | 0 (0/18)    | 0 (0/18)      | 0 (0/18)      | 17 (3/18)                | -                | -          | -           | -                     |
| Leaf DHS 3    | 89 (16/18)                                          | 11 (2/18)   | 44 (8/18)     | 11 (2/18)     | 11 (2/18)                | 0 (0/12)         | 0 (0/12)   | 0 (0/12)    | 0 (0/12)              |
| Leaf DHS 3R   | 100 (11/11)                                         | 36 (4/11)   | 36 (4/11)     | 55 (6/11)     | 18 (2/11)                | -                | -          | -           | -                     |
| Flower DHS 1  | 10 (2/21)                                           | 71 (15/21)  | 52 (11/21)    | 57 (12/21)    | 29 (6/21)                | 0 (0/14)         | 64 (9/14)  | 14 (2/14)   | 14 (2/14)             |
| Flower DHS1R  | 17 (2/12)                                           | 100 (12/12) | 83 (10/12)    | 58 (7/12)     | 42 (5/12)                | 0 (0/8)          | 75 (6/8)   | 0 (0/8)     | 0 (0/8)               |
| Flower DHS 2  | 15 (2/13)                                           | 15 (2/13)   | 8 (1/13)      | 0 (0/13)      | 8 (1/13)                 | 0 (0/13)         | 0 (0/13)   | 46 (6/13)   | 0 (0/13)              |
| Flower DHS 2R | 8 (1/12)                                            | 0 (0/12)    | 0 (0/12)      | 0 (0/12)      | 8 (1/12)                 | 0 (0/16)         | 6 (1/16)   | 69 (11/16)  | 0 (0/16)              |
| Flower DHS 3  | 0 (0/21)                                            | 0 (0/21)    | 0 (0/21)      | 0 (0/21)      | 0 (0/21)                 | 0 (0/14)         | 0 (0/14)   | 0 (0/14)    | 0 (0/14)              |
| N1            | 0 (0/24)                                            | 0 (0/24)    | 4 (1/24)      | 0 (0/24)      | 8 (2/24)                 | 0 (0/18)         | 0 (0/18)   | 0 (0/18)    | 0 (0/18)              |
| N2            | 4 (1/23)                                            | 4 (1/23)    | 13 (3/23)     | 0 (0/23)      | 0 (0/23)                 | 0 (0/14)         | 0 (0/14)   | 0 (0/14)    | 0 (0/14)              |
| N3            | 11 (3/27)                                           | 4 (1/27)    | 0 (0/27)      | 0 (0/27)      | 0 (0/27)                 | 0 (0/18)         | 0 (0/18)   | 0 (0/18)    | 0 (0/18)              |
| N4            | 4 (1/26)                                            | 0 (0/26)    | 0 (0/26)      | 0 (0/26)      | 0 (0/26)                 | 0 (0/17)         | 0 (0/17)   | 0 (0/17)    | 0 (0/17)              |
| N5            | 0 (0/23)                                            | 4 (1/23)    | 0 (0/23)      | 0 (0/23)      | 0 (0/23)                 | 6 (1/16)         | 6 (1/16)   | 6 (1/16)    | 6 (1/16)              |
| N6            | 0 (0/28)                                            | 0 (0/28)    | 0 (0/28)      | 0 (0/28)      | 0 (0/28)                 | 0 (0/11)         | 0 (0/11)   | 0 (0/11)    | 0 (0/11)              |
| N7            | 0 (0/20)                                            | 0 (0/20)    | 10 (2/20)     | 10 (2/20)     | 5 (1/20)                 | 0 (0/14)         | 0 (0/14)   | 0 (0/14)    | 0 (0/14)              |
| N8            | 0 (0/24)                                            | 0 (0/24)    | 8 (2/24)      | 13 (3/24)     | 4 (1/24)                 | 0 (0/12)         | 0 (0/12)   | 0 (0/12)    | 0 (0/12)              |
| N9            | 12 (3/25)                                           | 8 (2/25)    | 20 (5/25)     | 4 (1/25)      | 16 (4/25)                | 0 (0/13)         | 0 (0/13)   | 8 (1/13)    | 0 (0/13)              |
| N10           | 0 (0/30)                                            | 10 (3/30)   | 10 (3/30)     | 3 (1/30)      | 3 (1/30)                 | 0 (0/14)         | 0 (0/14)   | 0 (0/14)    | 0 (0/14)              |

**Supplemental Table 3.** Expression of six genes flanking enhancer L3 in wild-type Col-0 and T-DNA line GABI-Kat 909A07

| Gene Name                                              | -10k                             | -9k                          | -5k                              | +4k                                        | +7k                          | +11k                           | ACT2                              |
|--------------------------------------------------------|----------------------------------|------------------------------|----------------------------------|--------------------------------------------|------------------------------|--------------------------------|-----------------------------------|
| Gene ID                                                | AT2G45410                        | AT2G45412                    | AT2G45420                        | AT2G45430                                  | AT2G45440                    | AT2G45450                      | AT3G18780                         |
| Location                                               | Chr2:18712287-18713116           | Chr2:18714574-18714729       | Chr2:18718348-18720729           | Chr2:18727561-18728935                     | Chr2:18730840-18733015       | Chr2:18733275-18734127         | Chr3:6474842-6477204              |
| Annotation                                             | LOB domain-containing protein 19 | Unknown protein              | LOB domain-containing protein 18 | AT hook motif nuclear-localized protein 22 | Dihydrodipicolinate synthase | Protein binding                | Actin gene                        |
| Forward primer                                         | 5'CGAAATAAGGAGC<br>GAAAACG3'     | 5'GCCAACAGAATCG<br>ACGGTTG3' | 5'AACCGCAACCGCT<br>CTTTT3'       | 5'GGGCTAAAACGTG<br>ACCGAGA3'               | 5'CTGGTCGAACAGG<br>GCAAGAT3' | 5'CTGAAGCAGAGAG<br>AAGAGAGTT3' | 5'CTTGCACCAAGCA<br>GCATGAA3'      |
| Reverse primer                                         | 5'GGTGAAGAGGA<br>GGAGAAGG3'      | 5'CGACGTGGCTTGT<br>TTTGTGT3' | 5'TGAGGGCAAGGG<br>TGAGACT3'      | 5'GTGGCCTTCTCGT<br>GATGTGA3'               | 5'TCTTCGACTCGCT<br>TGTTCCC3' | 5'CGTGGAGAATCAA<br>AACATCA3'   | 5'CCGATCCAGACAC<br>TGTACTIONCTT3' |
| Expression in Col-0 (root) <sup>(1)</sup>              | 28.48 ± 0.98                     | 28.34 ± 0.85                 | 27.76 ± 0.89                     | 24.68 ± 0.44                               | 25.92 ± 0.65                 | 26.72 ± 0.84                   | 21.31 ± 0.47                      |
| Expression in Col-0 (leaf) <sup>(1)</sup>              | 32.77 ± 0.14                     | 34.75 ± 0.16                 | 31.79 ± 0.20                     | 29.25 ± 0.13                               | 25.90 ± 0.37                 | 27.81 ± 0.85                   | 20.39 ± 0.34                      |
| Expression in T-DNA line (root) <sup>(1)</sup>         | 28.09 ± 0.71                     | 28.11 ± 0.76                 | 27.49 ± 0.64                     | 25.03 ± 0.15                               | 25.77 ± 0.23                 | 26.28 ± 0.32                   | 20.94 ± 0.27                      |
| Expression in T-DNA line (leaf) <sup>(1)</sup>         | 32.69 ± 0.23                     | 34.22 ± 0.34                 | 31.77 ± 0.23                     | 28.07 ± 0.24                               | 26.05 ± 0.21                 | 26.93 ± 0.23                   | 20.66 ± 0.23                      |
| Col-0 root vs. Col-0 leaf (t-test) <sup>(2)</sup>      | 0.067                            | 0.033                        | 0.034                            | 0.011                                      | 0.026                        | 0.025                          |                                   |
| Col-0 root vs. T-DNA line root (t-test) <sup>(2)</sup> | 0.927                            | 0.925                        | 0.925                            | 0.022                                      | 0.271                        | 0.926                          |                                   |
| Col-0 leaf vs. T-DNA line leaf (t-test) <sup>(2)</sup> | 0.351                            | 0.056                        | 0.354                            | 0.001                                      | 0.016                        | 0.01                           |                                   |

<sup>(1)</sup> Real time qRT-PCR of gene expression is presented as the average number (from three biological replicates) of PCR cycles ± standard deviation.

<sup>(2)</sup> t-test of expression of the same gene in different tissues or different lines.
